# Supplementary material for: Photoacoustic Tomography Detects Response and Resistance to Bevacizumab in Breast Cancer Mouse Models
Source: PubMed Central journal article supplement (PMC9359720; doi:10.1158/0008-5472.can-21-0626), 2022-04-11
Supplement: can-21-0626_supplementary_data_suppsd1.pdf [file can-21-0626_supplementary_data_suppsd1.pdf]

## **Supplementary Information**

Photoacoustic tomography indicates response and resistance to Bevacizumab in breast cancer mouse models.

Isabel Quiros-Gonzalez<sup>1,2</sup>, Michal R Tomaszewski<sup>1,2</sup>, Monika A Golinska<sup>1,2</sup>, Emma Brown<sup>1,2</sup>,  
Laura Ansel-Bollepalli<sup>1,2</sup>, Lina Hacker<sup>1,2</sup>, Dominique-Laurent Couturier<sup>2</sup>, Rosa M. Sainz<sup>3</sup>,  
Sarah E Bohndiek<sup>1,2\*</sup>

<sup>1</sup> Department of Physics, University of Cambridge, JJ Thomson Avenue, Cambridge CB3 0HE, United Kingdom

<sup>2</sup> Cancer Research UK Cambridge Institute, University of Cambridge, Li Ka Shing Centre, Cambridge CB2 0RE, United Kingdom

<sup>3</sup> Cell Morphology and Biology Department, IUOPA and ISPA, Universidad de Oviedo, Oviedo 33006, Spain

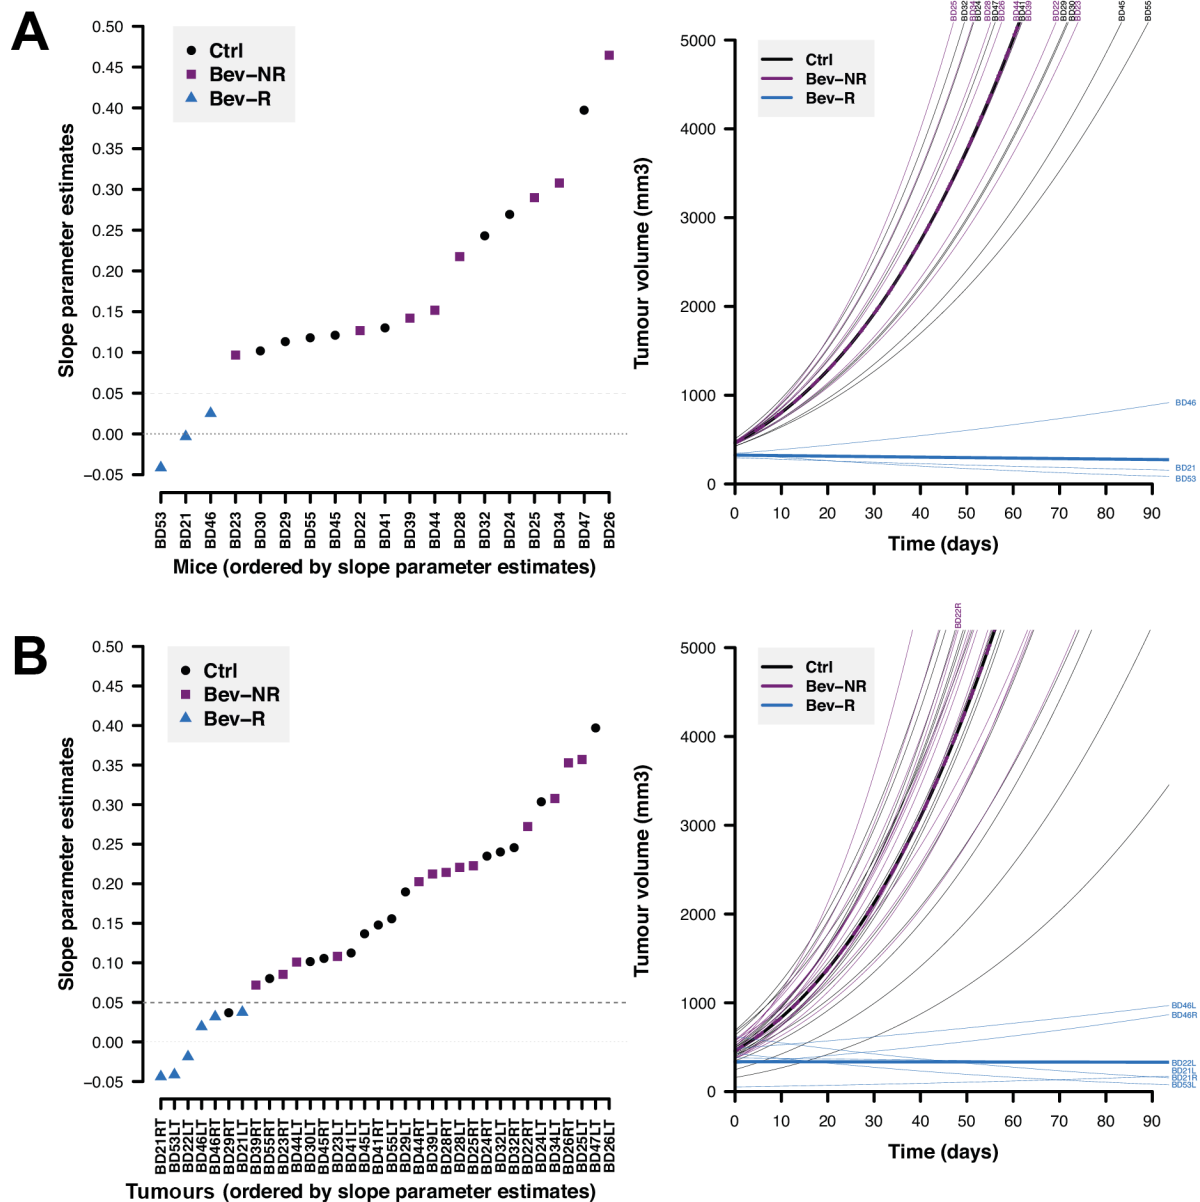

**Supplementary Figure 1: Linear regression modelling enabled identification of response on a per mouse (A) and per tumour (B) basis.** (A) Left: Slope parameter estimate (see Methods) on a per mouse basis, colour coded by group and ordered by estimate value, are shown for a linear regression model applied to the cube root of tumour volume. Parameters close to zero or negative mean that the tumour volume was controlled or reduced respectively. Right: the predicted responder group and predicted growth rate per mouse according to the expectation-maximisation algorithm. (B) Equivalent analysis but on a per tumour basis.

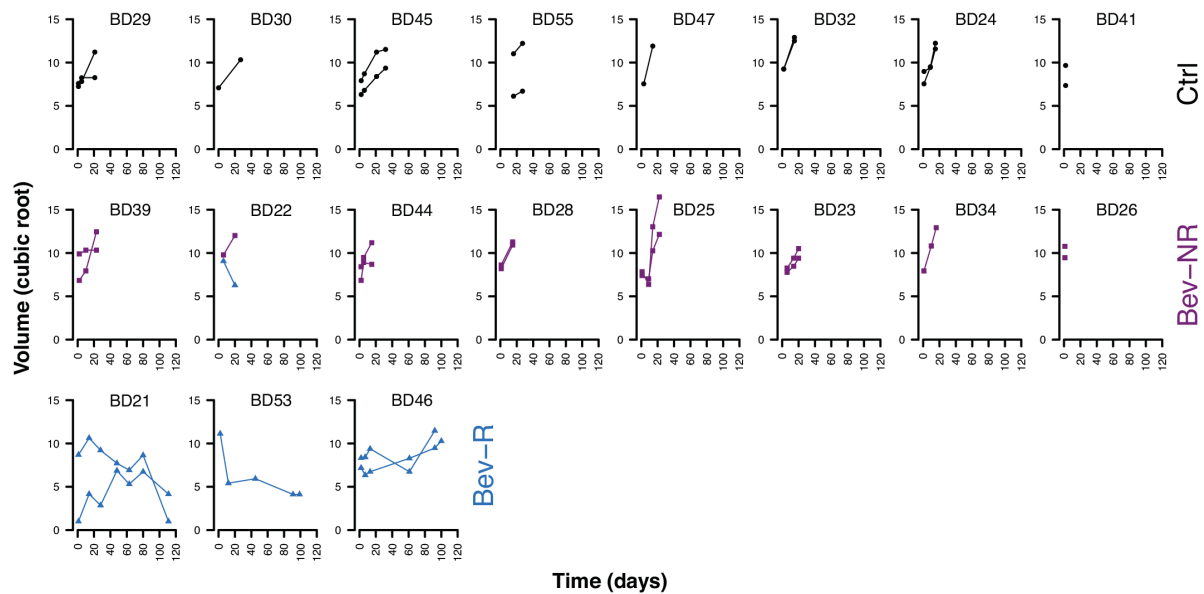

**Supplementary Figure 2: Final groupings of animals and tumours by response.** Volume on the cubic root scale of each tumour (lines) and each mouse (plot) grouped by mouse-level control (Ctrl), non-responding (Bev-NR) and responding (Bev-R) groups. At the mouse level, three mice showed a significant ( $p < 0.05$ ) negative difference in their slope parameter compared to the average of the control group (Supplementary Figure 1A, right) and all three animals are therefore considered to belong to the responding (Bev-R) group for the presented analyses conducted at the systemic level (i.e. serum assays). At the tumour level, 6 tumours show a significant ( $p < 0.05$ ) negative difference in their slope parameter compared to the average of the control group (Supplementary Figure 1B, right) therefore these 6 tumours are considered to belong to responding (Bev-R) group for all other analyses, which were conducted at the per tumour level. Insufficient growth rate information was available after enrolment time for BD41 or BD26 to allow growth rate modelling. In the case of BD26, neither algorithm considered it as a responder.

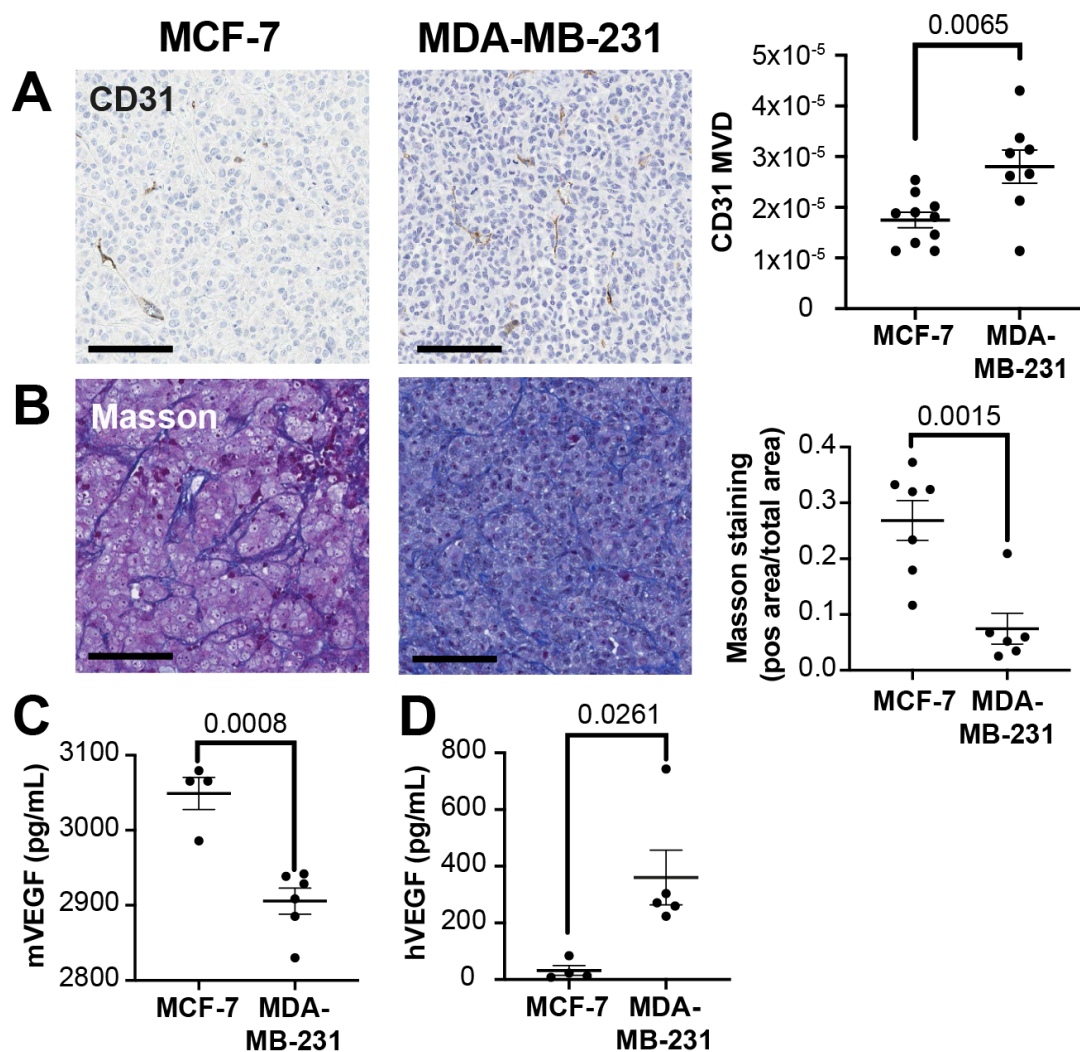

**Supplementary Figure 3: Comparison of MCF-7 and MDA-MB-231 microenvironment at time of enrolment (tumour volume reaches 0.5 cm<sup>3</sup>).** (A) CD31 positive microvessel density (MVD, vessel/ $\mu\text{m}^2$ ) was significantly higher for the MDA-MB-231 cohort compared to the MCF-7 cohort (MCF-7  $n_{\text{tumours}}=10$ , MDA-MB-231  $n_{\text{tumours}}=8$ ); scale bar 100  $\mu\text{m}$ . (B) Extracellular matrix stained by Masson's trichrome staining showing MDA-MB-231 tumours had significantly lower levels of collagen deposition than MCF-7 tumours (MCF-7  $n_{\text{tumours}}=10$ , MDA-MB-231  $n_{\text{tumours}}=8$ ); scale bar 100  $\mu\text{m}$ . (C) Circulating mouse VEGF (host source) is significantly higher in MCF-7 (MCF-7  $n_{\text{mice}}=4$ , MDA-MB-231  $n_{\text{mice}}=6$ ). (D) Circulating human VEGF (tumour source) is significantly higher in MDA-MB-231 (MCF-7  $n_{\text{mice}}=4$ , MDA-MB-231  $n_{\text{mice}}=5$ ). All panels, p-values displayed from 2-sided Student's t-tests except for (D) where a 2-sided Welch's t-test is performed due to unequal variances between the groups.

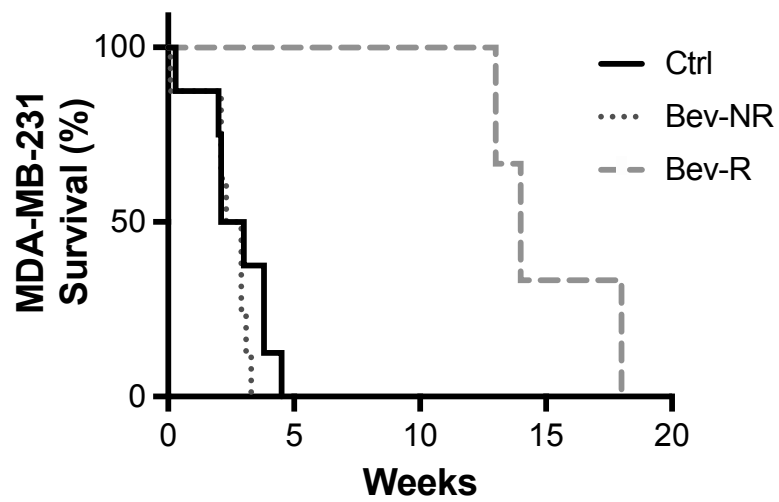

**Supplementary Figure 4:** Survival analysis for MDA-MB-231 tumours according to the non-responding and responding groups.

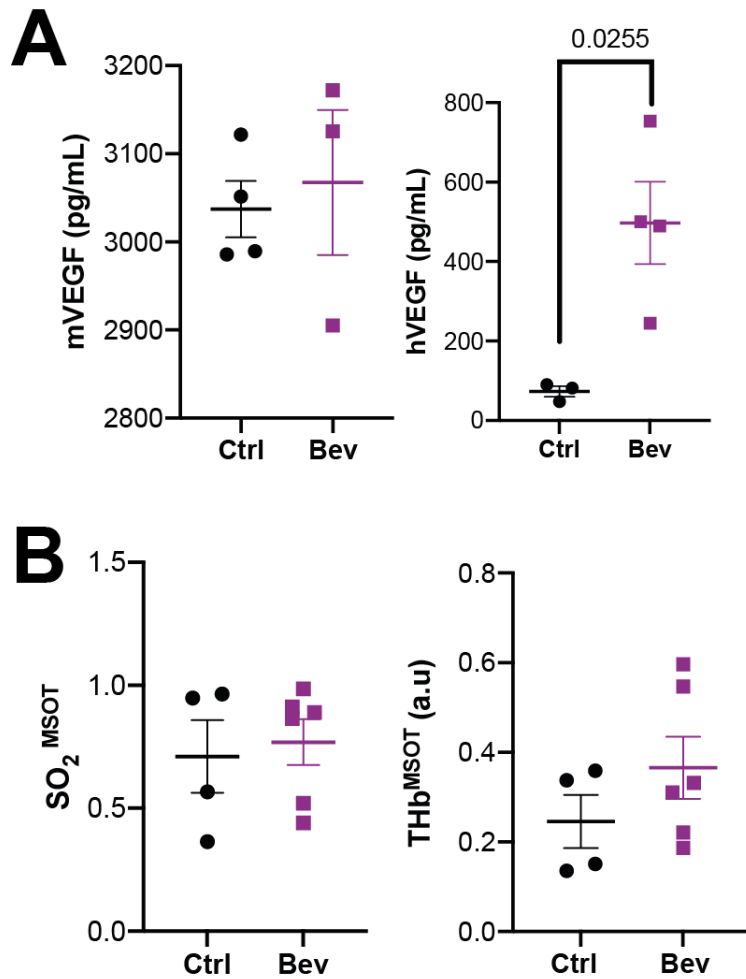

**Supplementary Figure 5: MCF-7 Bevacizumab treatment response.** (A) Circulating mouse VEGF (microenvironment source) shows no changes in response to Bev treatment (Ctrl  $n_{mice}=4$ , Bev  $n_{mice}=3$ ), while circulating human VEGF (tumour source) is increases substantially after Bev treatment (Ctrl  $n_{mice}=3$ , Bev  $n_{mice}=4$ ). (B) Tumour oxygenation ( $SO_2^{MSOT}$ ) and haemoglobin content ( $THb^{MSOT}$ ) extracted from PAT images of MCF-7 tumours shows no change in response to Bev treatment (Ctrl  $n_{tumours}=4$ , Bev  $n_{tumours}=6$ ). All panels, p-values are displayed from a 2-sided Welch's t-test due to unequal variances.

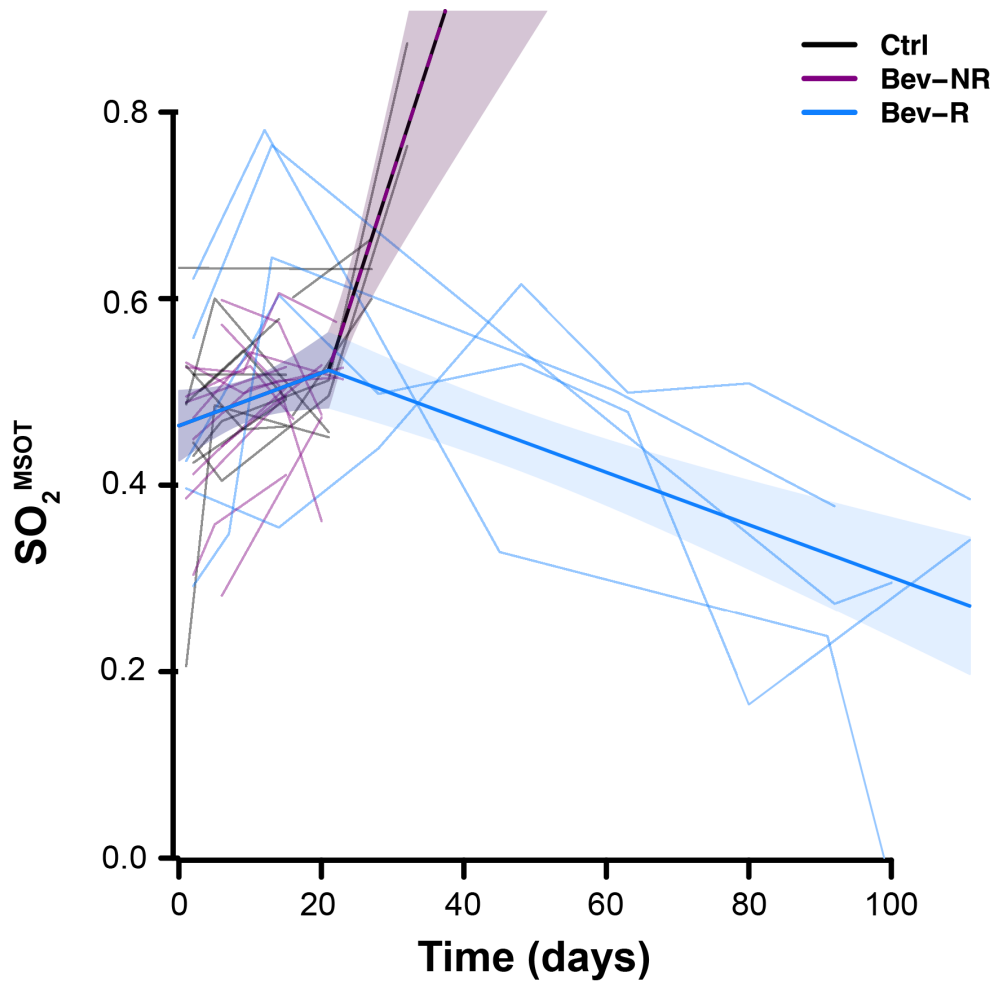

**Supplementary Figure 6: Longitudinal analysis showing trajectories for each individual tumour.** Duplicate of Figure 4D showing individual trajectories that contribute to the trendline.

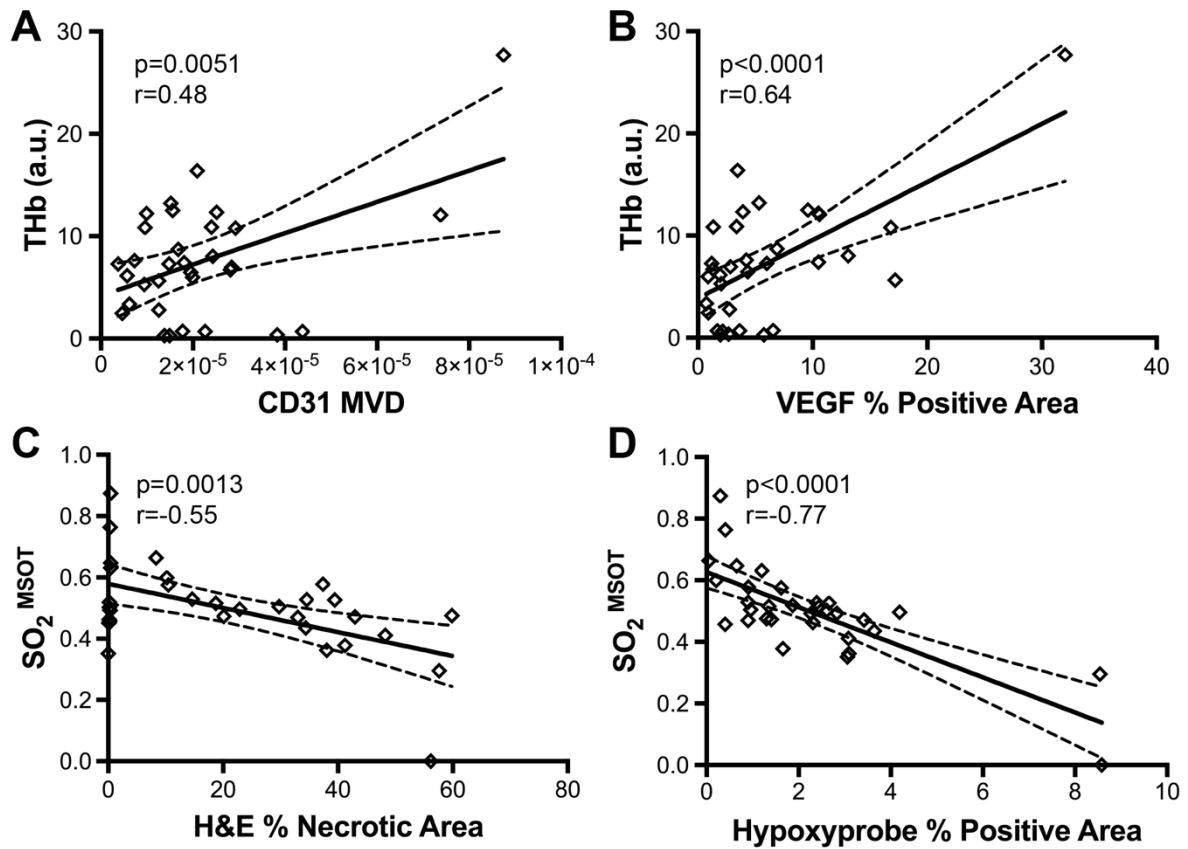

**Supplementary Figure 7: Correlation analyses between *in vivo* PAT data and *ex vivo* immunohistochemistry data across all groups.** (A) Correlation between PAT THb and CD31 microvessel density (MVD). (B) Correlation between THb and VEGF positive area. (C) Correlation between PAT  $SO_2^{MSOT}$  and necrotic area. (D) Correlation between  $SO_2^{MSOT}$  and hypoxyprobe positive area.



**Supplementary Table 1. MDA-MB-231 mouse cohort (n=31).** Mice marked in white and grey were included in the indicated experimental group. Mice marked in yellow, green and red were excluded. CON = control; BEV = Bevacizumab treated; Initial = tumours excised after imaging at the point of enrolment to provide a pre-treatment reference; Final = tumours monitored throughout treatment and excised at endpoint. Colour code: Grey - one tumour was absent (no growth), Red - both tumours were absent (no growth), Yellow - Mouse lost during PAT procedure, Green - Samples for histopathology or images from PAT could not be processed for further analysis.

| <b>Mouse ID</b>                                | <b>Group</b>                      |
|------------------------------------------------|-----------------------------------|
| BD21                                           | BEV Final Left tumour only        |
| BD22                                           | BEV Final group                   |
| BD23                                           | BEV Final group                   |
| BD24                                           | CON Final group                   |
| BD25                                           | BEV Final group                   |
| BD26                                           | BEV Final group                   |
| BD27                                           | CON Initial (pre-treatment) Group |
| BD28                                           | BEV Final group                   |
| BD29                                           | CON Final group                   |
| BD30                                           | CON Final Left tumour only        |
| BD31                                           | Lost during procedure             |
| BD32                                           | CON Final group                   |
| BD33                                           | CON Initial (pre-treatment) Group |
| BD34                                           | BEV Final Left tumour only        |
| BD35                                           | CON Initial (pre-treatment) Group |
| BD36                                           | CON Initial (pre-treatment) Group |
| BD38                                           | CON Initial (pre-treatment) Group |
| BD39                                           | BEV Final group                   |
| BD41                                           | CON Final group                   |
| BD42                                           | Lost during procedure             |
| BD43                                           | Faulty Histological or PAT        |
| BD44                                           | BEV Final group                   |
| BD45                                           | CON Final group                   |
| BD46                                           | BEV Final group                   |
| BD47                                           | CON Final Left tumour only        |
| BD49                                           | CON Initial (pre-treatment) Group |
| BD50                                           | No tumour growth                  |
| BC52                                           | Faulty Histological or PAT        |
| BC53                                           | BEV Final Left tumour only        |
| BC54                                           | Faulty Histological or PAT        |
| BC55                                           | CON Final group                   |
| <b>Total number of mice final group= 19</b>    |                                   |
| <b>Total number of tumours final group= 33</b> |                                   |

**Supplementary Table 2. MCF-7 mouse cohort (n=24).** Mice marked in white and grey were included in the indicated experimental group. Mice marked in yellow, green and red were excluded. CON = control; BEV = Bevacizumab treated; Initial = tumours excised after imaging at the point of enrolment to provide a pre-treatment reference; Final = tumours monitored throughout treatment and excised at endpoint. Colour code: Red - Both tumours were absent (no growth), Orange - Estrogen pellet expired (i.e. beyond 90 days from implantation), Yellow - Mouse lost during PAT procedure or due to estrogen side effects, Green - Samples for histopathology or images from PAT could not be processed for further analysis.

| <b>Mouse ID</b>                                | <b>Group</b>                      |
|------------------------------------------------|-----------------------------------|
| BC21                                           | BEV Final group                   |
| BC22                                           | CON Initial (pre-treatment) group |
| BC24                                           | Estrogen Loss                     |
| BC25                                           | CON Final group                   |
| BC26                                           | CON Final group                   |
| BC27                                           | No tumour growth                  |
| BC28                                           | BEV Final group                   |
| BC29                                           | Estrogen Loss                     |
| BC30                                           | Lost during experiment            |
| BC31                                           | Lost during experiment            |
| BC32                                           | CON Initial (pre-treatment) group |
| BC33                                           | Faulty Histology or PAT           |
| BC34                                           | Lost during experiment            |
| BC35                                           | CON Initial (pre-treatment) group |
| BC36                                           | CON Final group                   |
| BC37                                           | CON Initial (pre-treatment) group |
| BC38                                           | Faulty Histology or PAT           |
| BC39                                           | CON Initial (pre-treatment) group |
| BC40                                           | Estrogen Loss                     |
| BC41                                           | Estrogen Loss                     |
| BC42                                           | Lost during experiment            |
| BC43                                           | CON Initial (pre-treatment) group |
| BC44                                           | Estrogen Loss                     |
| BC45                                           | Estrogen Loss                     |
| <b>Total number of mice final group= 7</b>     |                                   |
| <b>Total number of tumours final group= 14</b> |                                   |

**Supplementary Table 3.** Experimental numbers for the number of tumour samples contributing to each figure and panel in the main manuscript.

| <b>Figure Panel</b> | <b>Description</b>        | <b>Ctrl</b> | <b>Bev</b> | <b>Bev-NR</b> | <b>Bev-R</b> |
|---------------------|---------------------------|-------------|------------|---------------|--------------|
| <b>1</b> B          | Survival curve MCF-7      | 4           | 4          | -             | -            |
| B                   | Survival curve MDA-MB-231 | 8           | 11         | -             | -            |
| C                   | Tumour growth MDA-MB-231  | 14          | 20         | -             | -            |
| <b>2</b> A & B      | VEGF Elisa                | 5           | -          | 6             | 3            |
| C                   | Biochemical Hb            | 7           | -          | 8             | 2            |
| D                   | VEGF IHC                  | 14          | -          | 14            | 5            |
| <b>3</b> -          | MSOT final                | 14          | -          | 14            | 6            |
| <b>4</b> -          | MSOT predictive           | 14          | -          | 14            | 6            |
| <b>5</b> A          | H&E Necrosis              | 14          | -          | 13            | 4            |
| B                   | MVD (CD31 IHC)            | 14          | -          | 13            | 5            |
| C                   | ASMA (IHC)                | 14          | -          | 14            | 4            |
| D & E               | Hypoxyprobe               | 13          | -          | 14            | 5            |
| F                   | CD31/ASMA                 | 14          | -          | 14            | 4            |
| G                   | Tol Blue                  | 14          | -          | 14            | 5            |
| H                   | F4/80 (IHC)               | 14          | -          | 14            | 5            |
